# Supplementary material for: Analysis of zebrafish (Danio rerio) behavior in response to bacterial infection using a self-organizing map
Source: PubMed Central journal article supplement (PMC4619490; doi:10.1186/s12917-015-0579-2), 2015-10-23

**Figure S1. Cluster analysis after running SOM.** The vertical bar showed standard deviation. The different alphabets presented significant difference according to the Tukey's method ( $p < 0.05$ ). The numeric number on  $x$  axis indicates each cluster in figure 6.

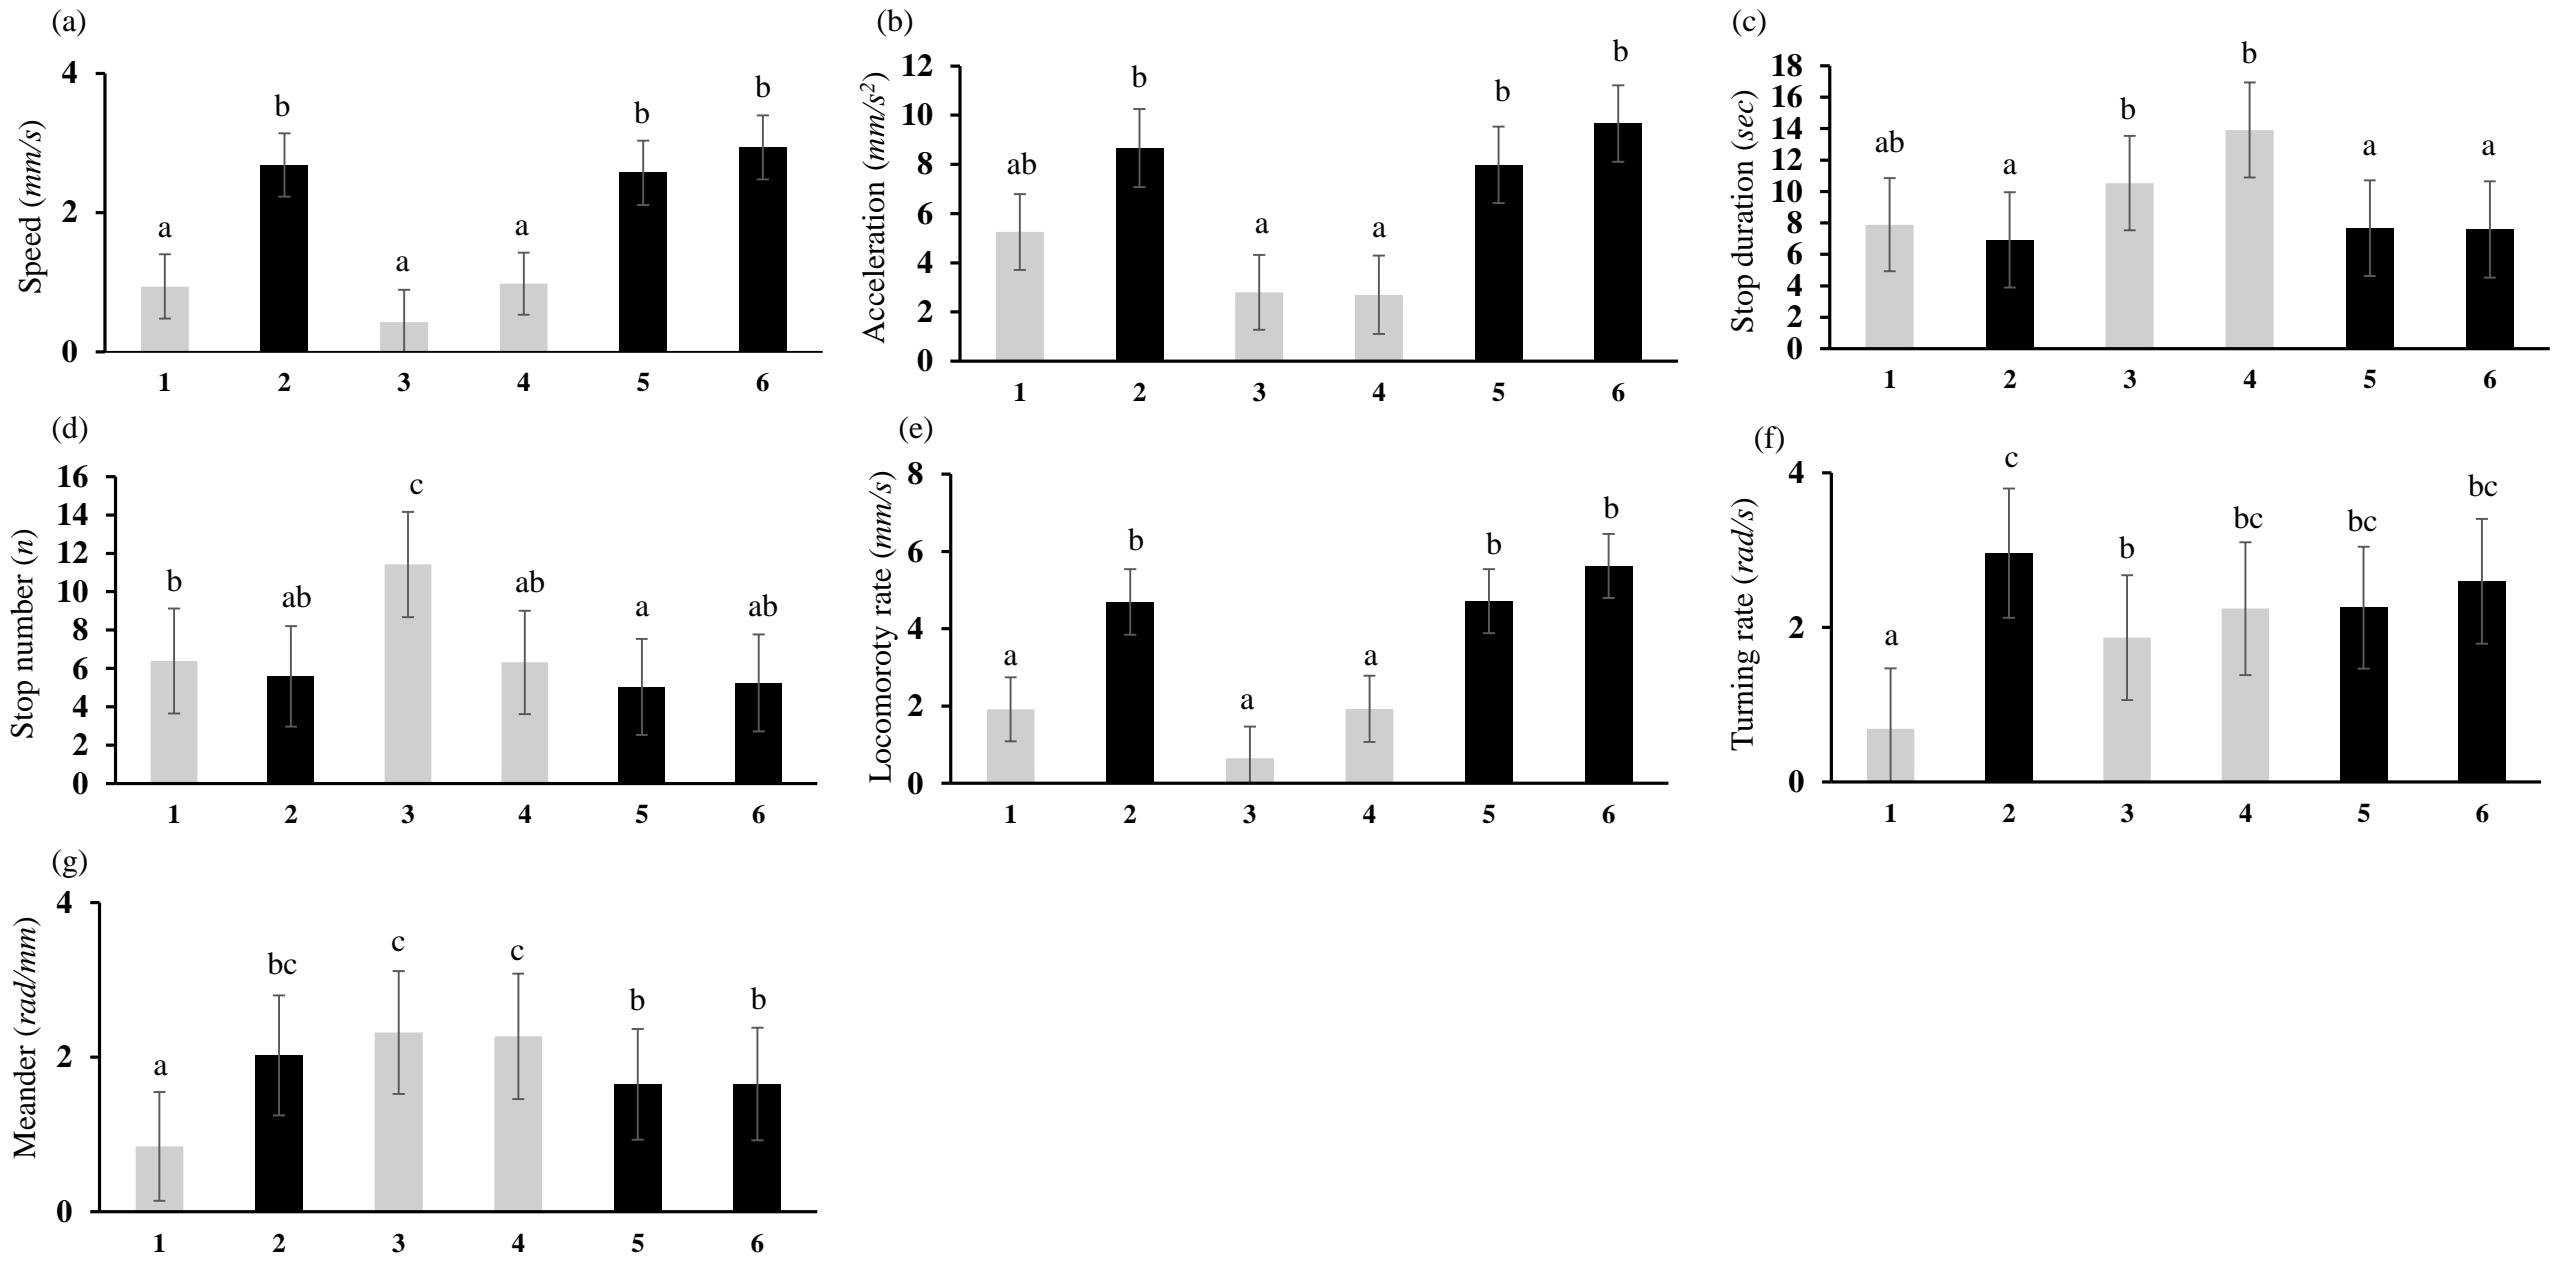

Supplement: 12917_2015_579_MOESM1_ESM.pdf [file 12917_2015_579_MOESM1_ESM.pdf]
